# Supplementary material
Source: PubMed Central journal article supplement (PMC4469197)
Supplement: NIHMS683943-supplement-01.pdf [file NIHMS683943-supplement-01.pdf]

## APPENDIX A – MRI acquisition parameters

|                                                                                        |             |           |                                 |              |           |                                                    |                    |           |           |  |
|----------------------------------------------------------------------------------------|-------------|-----------|---------------------------------|--------------|-----------|----------------------------------------------------|--------------------|-----------|-----------|--|
| # Subjects                                                                             | 1           |           |                                 | 1            |           |                                                    | 1                  |           | 1         |  |
| TR (ms)                                                                                | T1w         | T2w       | DWI                             | T1w          | T2w       | T1w                                                | T2w                | T1w       | T2w       |  |
| TE (ms)                                                                                | 1820        | 6200      | 5200                            | 1820         | 5270      | 1820                                               | 6200               | 1820      | 6200      |  |
| Time (min)                                                                             | 4:38        | 124       | 73                              | 4:38         | 124       | 124                                                | 124                | 4:38      | 119       |  |
| Acq matrix                                                                             | 5:51        | 5:32      | 6:30                            | N/A          | N/A       | N/A                                                | N/A                | 5:51      | 5:32      |  |
| Thickness (mm)                                                                         | 192x256     | 128x256   | 128x128                         | 144x256      | 104x256   | 192x256                                            | 128x256            | 192x256   | 128x256   |  |
| # Slices                                                                               | 1           | 1.95      | 2                               | 1            | 1.95      | 1                                                  | 1.95               | 1         | 1.95      |  |
| Spacing (mm)                                                                           | 144         | 56        | 45                              | 144          | 70        | 192                                                | 58                 | 192       | 56        |  |
| FOV (mm^2)                                                                             | 0.9x0.9     | 1.25x1.25 | 2x2                             | 1x1          | 1.25x1.25 | 1x1                                                | 1.25x1.25          | 0.9x0.9   | 1.25x1.25 |  |
| Coil                                                                                   | 173x230     | 160x320   | 256x256                         | 144x256      | 130x320   | 192x256                                            | 160x320            | 173x230   | 160x320   |  |
| Flip angle (°)                                                                         | N/A         |           |                                 | Head3T       |           |                                                    | N/A                |           | Head3T    |  |
| Sequence                                                                               | 7           | 150       | N/A                             | 7            | 150       | 7                                                  | 150                | 7         | 150       |  |
| Scanner                                                                                | mprage      | TPE       | N/A                             | mp_rage_fast | TSE       | mp_rage                                            | TSE                | mp_rage   | N/A       |  |
| Manufacturer                                                                           | Allegra     |           |                                 | Allegra      |           |                                                    | Allegra            |           | Allegra   |  |
| bvalue (s/mm^2)                                                                        | Siemens     |           |                                 | Siemens      |           |                                                    | Siemens            |           | Siemens   |  |
| # Directions                                                                           | 1000        |           |                                 |              |           |                                                    |                    |           |           |  |
| # b0                                                                                   | 30          |           |                                 |              |           |                                                    |                    |           |           |  |
| Location                                                                               | 5           |           |                                 |              |           |                                                    |                    |           |           |  |
| Biomedical Image Research Center (BRIC) at the University of North Carolina (UNC), USA |             |           |                                 |              |           |                                                    |                    |           |           |  |
| Subjects                                                                               | 4           |           |                                 | 2            |           |                                                    | 2                  |           |           |  |
| TR (ms)                                                                                | T1w         | T2w       | DWI (#3)                        | T1w          | T2w       | DWI                                                | T1w                | T2w       |           |  |
| TE (ms)                                                                                | 1820        | 3200      | 7200                            | 1820         | 32000     | 8900                                               | 9.4                | 6293      |           |  |
| Time (min)                                                                             | 3.75        | 406       | 83                              | 4:38         | 255       | 83                                                 | 4.6                | 120       |           |  |
| Acq matrix                                                                             | N/A         | N/A       | N/A                             | 6:10         | 4:10      | N/A                                                | 3:27               | 5:24      |           |  |
| Thickness (mm)                                                                         | 144x256     | 192x256   | 96x128                          | 224x256      | 256x256   | 112x128                                            | 192x152            | 336x234   |           |  |
| # Slices                                                                               | 1           | 1         | 2                               | 1            | 1         | 2                                                  | 2                  | 2         |           |  |
| Spacing (mm)                                                                           | 144         | 160       | 62                              | 160          | 160       | 75                                                 | 50                 | 50        |           |  |
| FOV (mm^2)                                                                             | 1x1         | 1x1       | 2x2                             | 1x1          | 1x1       | 2x2                                                | 0.94x0.94          | 0.54x0.61 |           |  |
| Coil                                                                                   | 144x256     | 192x256   | 192x256                         | 224x256      | 256x256   | 224x256                                            | 180x180            | 180x180   |           |  |
| Flip angle (°)                                                                         | HEA;HEP     |           |                                 | N/A          |           |                                                    | Philips SENSE head |           |           |  |
| Sequence                                                                               | 7           | N/A       | 90                              | 7            | N/A       | N/A                                                | N/A                |           |           |  |
| Scanner                                                                                | mp_rage_p2  | TSE       | iff_42dir_                      | mp-rage      | N/A       | N/A                                                | TFE                | TSE       |           |  |
| Manufacturer                                                                           | Tim Trio 3T |           |                                 | Tim Trio 3T  |           |                                                    | 3T                 |           |           |  |
| bvalue (s/mm^2)                                                                        | Siemens     |           |                                 | Siemens      |           |                                                    | Philips            |           |           |  |
| # Directions                                                                           | 1000        |           |                                 |              |           |                                                    |                    |           |           |  |
| # b0                                                                                   | 42          |           |                                 |              |           |                                                    |                    |           |           |  |
| Location                                                                               | 7           |           |                                 |              |           |                                                    |                    |           |           |  |
| BRIC at UNC, USA                                                                       |             |           | University of Irvine (UCI), USA |              |           | University Medical Center Utrecht, The Netherlands |                    |           |           |  |
